# Supplementary material
Source: PubMed Central journal article supplement (PMC2409422)
Supplement: 0708406105_Supplemental_PDF.pdf [file 0708406105_Supplemental_PDF.pdf]

# Supporting Information

Hong et al. 10.1073/pnas.0708406105

## SI Text

**Chemoattraction Assays.** To test for the effects of cGMP on NILs, we used 15 nl of ETDA as attractant for lines in California background (same as in Fig. 3), and 1.5 nl of ETDA was used for *NIL WAI* in the Washington background because of the already strong chemoattraction to 15 nl of ETDA in *NIL WAI* without cGMP treatment (Fig. S1). Because only well fed nematodes were used in our assays, and that mock, cGMP, and adaptation treatments all involved soaking worms in M9 buffer for at least 1 h, differences to normal chemotaxis assay (<30 min in buffer) may incur as the result of response to prolonged starvation (17). In particular, the chemoattraction of *NIL CA* lines and wild-type California to ETDA and pentanedione were enhanced by such incidental starvation treatments, respectively.

**RIL Construction.** Randomly picked single F<sub>2</sub> larvae from crosses between California and Washington strains were transferred to new plates for at least 10 generations before analysis (19). The high rate of RIL extinction (18%) is higher than other RILs constructed from similar crosses between California and Hawaii, or California and a Japanese strain (ref. 1 and G. Bento unpublished data), suggesting the existence of several heterozygous incompatible loci between California and Washington, which contain ≈4.5% nucleotide polymorphism between their genome sequences (D. Dieterich, unpublished results). We assayed 200 surviving F<sub>11</sub> RILs and selected 22 lines most insensitive to 15 nl of ETDA. After confirming insensitivity for three generations (F<sub>11-13</sub>), the 22 selected line were mapped by using standard SSCP mapping markers (single-stranded conformation polymorphism) (2). We scored markers at ≈20–50 cM intervals. The two regions with the most California haplotypes (≈15 or 16 of 22 lines having the homozygous California alleles in regions I and II, respectively) mapped to the bottom of chromosome IV, with region I delineated as S286–S587 (150–166 cM) and region II as >S290 (>176 cM).

**NIL Construction.** *egl-4* was genotyped with the intragenic SSCP marker S591, and after the eighth introgression cross, also selected for the desired reciprocal background genotype at the flanking markers with markers S34 and S587 (≈7 cM interval). For *NIL WAI*, which we could not reduce the donor *egl-4* allele to a smaller interval similar to *NIL CAI*, we found no recombinants between the markers S591(*egl-4*) and S587 after examining 197 individuals in the F<sub>10</sub> and F<sub>12</sub> generations. Although we were able to isolate individuals that were heterozygous for S591 and homozygous Washington for S587, these heterozygotes segregated only for Washington or heterozygous genotypes, but not the desired California genotype, suggesting possible regions of incompatibility. The expected region of donor parent genome retained in the recurrent parent background after 12 introgression crosses is  $15.4 \pm 11$  cM on chromosome IV (7.6% of 203 cM) and 0.10 cM in all nonlinked chromosomes (0.01% of 880 cM total) as calculated by the formula:  $2((1 - e^{-tL_M/2})/tL_M)$ , where  $t$  is the number of backcrosses and  $L_M$  is the length of the marker chromosome (3) (summarized in Table S2).

**Molecular cloning of *egl-4*.** A BLASTX search, using *C. elegans* Wormpep160 freeze with various contigs of the finished 9× coverage *P. pacificus* California genome, identified contig85.28 as a clear 1–1 ortholog for the *C. elegans egl-4* gene (www.pristionchus.org). *Ppa-egl-4* contains a ≈2.4-kb coding region with 24 exons spanning ≈19 kb of genomic sequence. Full-length

*Ppa-egl-4* from PS312 and PS1843 strains were obtained by using RH12031/RH11818 (first round); RH12032/RH11819 (second round) primers from random hexamer primed (N<sub>6</sub>) cDNA. Overlapping PCR products containing the 3rd–24th exons were used to amplify *egl-4* cDNA from JU138 (Hawaii) and RS106 (Poland) strains (RH11820/RH12550; RH11819/RH12589 for the 5′ 1.6 kb and RH11818/RH12548; RH11821/RH12162 for the 3′ 700-bp fragments). No alternative splice forms from either N<sub>6</sub> or polyT primed cDNAs were ever detected in the four *P. pacificus* strains using these primers. 5′ and 3′ RACE reactions were performed by using the SL1 and polyT primers as described in ref. 4. By contrast, at least three splice forms were detected from *Pristionchus* sp. 11 cDNAs, using similarly positioned RH14744/RH14746 (first round) and RH14745/RH14747 (second round) primers. However, the N<sub>6</sub> cDNA contains a longer transcript detected only by RH12587/RH13990 primers. The cDNA of the paralog of *Ppa-egl-4*, *Ppa-C09G4.2*, was isolated with RH13113/RH13114 (first round) and RH13115/RH13116 (second-round) primers. The accession numbers for the genes mentioned are EU375876–EU375890.

**EGL-4 Protein Expression.** *C. elegans* anti-EGL-4 antibody corresponding to amino acids 35–138 was a gift from M. Fujiwara and Y. Ohshima (Kyushu University, Kyushu, Japan) (5, 6). Approximately 30 adult *P. pacificus* hermaphrodites were washed briefly in M9 and lysed at 80°C in 80 μl of Laemmli lysis buffer for 5 min. Five to 15 μl of the lysates were loaded onto 8% SDS/PAGE gels, electroblotted onto nitrocellulose membranes, and immunostained with the EGL-4 antibody. The membrane was incubated in TPBS (PBS buffer without MgCl<sub>2</sub>, 0.05% Tween-20, and 2% BSA) for 1 h followed by incubation with a 1:5,000 dilution of EGL-4 antibody for >12 h at 4°C with gentle rocking. The primary anti-ALPHA-TUBULIN antibody (human) (Dianova) was used as a loading control to detect 57kD antigen. The membrane was then incubated with 1:1,000 dilution of anti-rabbit IgG alkaline phosphatase conjugate (Dianova) and washed three times in 1 h. Color visualization was done with BCIP/NBT solution (Sigma). EGL-4 immunostaining of whole California strain J4 to adult stage nematodes was done by using the Finney-Ruvkun protocol as modified for *P. pacificus* (7, 8) available under “Protocol” on www.pristionchus.org/wikionchus.

***egl-4* Deletion Mutant.** To obtain a loss-of-function deletion mutant, we mutagenized with trimethylpsoralen-UV and screened ≈1.06 × 10<sup>6</sup> genomes in the PS312 background (9), using the primers RH11962/RH11964 (first round) and RH11963/RH11965 (second round), targeting 1817 bp of the genomic region containing the first two exons (94°C for 30 s, 58°C for 20 s, 72°C for 3 min, 30 cycles, with 1:3 dilution of template for second round PCR). We isolated a mutant with a 779-bp deletion of the entire second exon and flanking introns that resulted in a putative early stop. This line *tu374* was outcrossed to PS312 four times, using PCR genotyping before commencing analyses. See Table S5 for primer sequences.

**Quantitative Reverse Transcriptase-PCR (qRT-PCR).** Developmentally staged RNA was obtained from various strains of *P. pacificus* J3 and J4/young adults using synchronizing eggs by bleaching or letting gravid adults lay eggs for 24 h at 20°C. J4/young adult samples do not contain laid eggs and J1 embryos. RNA was isolated with TRIZOL, treated with RQ1 DNase (Promega), and reverse transcribed with random hexamer (N<sub>6</sub>) or polyT (Q<sub>t</sub>)



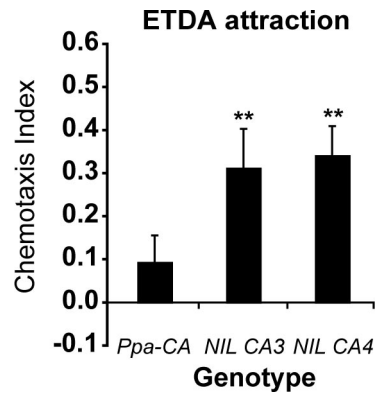

**Fig. S1.** Chemoattraction of additional *NIL CA* lines (CA3 and CA4) containing the *egl-4* WA locus also showed enhanced ETDA attraction compared with the parental California strain. (\*\*,  $P < 0.01$ , Dunnett's *posthoc* multiple comparisons test). Error bars denote SEM.



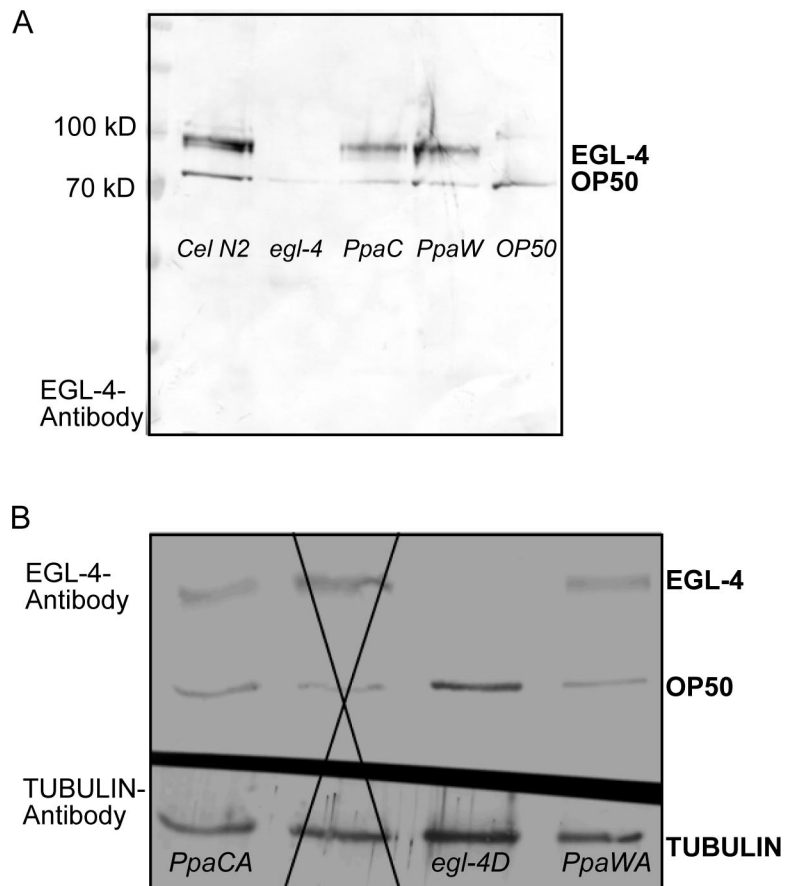

**Fig. S3.** Western blots of whole adult hermaphrodite protein extracts ( $n = 30$  for each genotype), using an anti-*Cel*-EGL-4 antibody. (A) The EGL-4 antibody is specific for  $\approx 95$ -kDa doublet bands found in *C. elegans* *N2* wild-type (lane 1) but not the loss-of-function *egl-4* mutant *n479* (lane 2; a smaller band  $< 70$  kD is visible) (14) or the OP50 *Escherichia coli* food source (lane 5, nonspecific  $\approx 80$ -kDa and  $> 100$ -kDa bands). The EGL-4 antibody cross hybridizes with a single  $\approx 95$ -kDa protein in *P. pacificus* strains California and Washington (lanes 3–4). (B) (Upper) Using the EGL-4 antibody, no 95-kDa antigen corresponding to the *Ppa*-EGL-4 was detected in the *Ppa-egl-4* deletion mutant (*egl-4D*, lane 3) compared with the *P. pacificus* wild-type strains (lanes 1 and 4). Lane 2 is not relevant. Bottom: A protein loading control of the same blot, using a human *alpha-tubulin* antibody (57kD antigen) showed approximately equal loading in all lanes.

| ETDA       |        |                                        |
|------------|--------|----------------------------------------|
| ATTRACTION | STRAIN | SEQUENCE                               |
| -ETDA      | CALI   | TATTGTTAGATCAGATAAA (-1840 bp)         |
| -ETDA      | CHNA   | TATTGTTAGATCAGATAAA                    |
| +ETDA      | POLD   | TATTGTTAGATCAGATAAA                    |
| +ETDA      | HAWA   | TATTATTAGATCAGATAAA                    |
| +ETDA      | WASH   | TATTATTAGATCAGATAAA                    |
| +ETDA      | BOLI   | TATTATTAGATCAGATAAA                    |
| +ETDA      | JAPN   | TATTATTAGATCAGATAAA                    |
| +ETDA      | MADG   | TATTATTAGATCAGATAAA                    |
|            |        |                                        |
| -ETDA      | CALI   | TCCGACTGAATAGCAGACGAAAGAAAC (-1660 bp) |
| -ETDA      | CHNA   | TCCGACTGAATAGCAGACGAAAGAAAC            |
| +ETDA      | POLD   | TCCGACTGAATAGCAGACGAAAGAAAC            |
| +ETDA      | HAWA   | TCCGACTGAATAGCAGACGATGAAAC             |
| +ETDA      | WASH   | TCCGACTGAATAGCAGACGATGAAAC             |
| +ETDA      | BOLI   | TCCGACTGAATAGCAGACGATGAAAC             |
| +ETDA      | JAPN   | TCCGACTGAATAGCAGACGATGAAAC             |
| +ETDA      | MADG   | TCCGACTGAATAGCAGACGATGAAAC             |
|            |        |                                        |
| -ETDA      | CALI   | TCGTAATTTT-----CGGAAAGGA (-1617 bp)    |
| -ETDA      | CHNA   | TCGTAATTTT-----CGGAAAGGA               |
| +ETDA      | POLD   | TCGTAATTTT-----CGGAAAGGA               |
| +ETDA      | HAWA   | TCGTAATTTTCCGGCCTTCGGAAAGGA            |
| +ETDA      | WASH   | TCGTAATTTTCCGGCCTTCGGAAAGGA            |
| +ETDA      | BOLI   | TCGTAATTTTCCGGCCTTCGGAAAGGA            |
| +ETDA      | JAPN   | TCGTAATTTTCCGGCCTTCGGAAAGGA            |
| +ETDA      | MADG   | TCGTAATTTTCCGGCCTTCGGAAAGGA            |
|            |        |                                        |
| -ETDA      | CALI   | ATTTAGACGGAGAGAATGA (-1518 bp)         |
| -ETDA      | CHNA   | ATTTAGACGGAGAGAATGA                    |
| +ETDA      | POLD   | ATTTAGACGGAGAGAATGA                    |
| +ETDA      | HAWA   | ATTTAGACGGAGAGAGTGA                    |
| +ETDA      | WASH   | ATTTAGACGGAGAGAGTGA                    |
| +ETDA      | BOLI   | ATTTAGACGGAGAGAGTGA                    |
| +ETDA      | JAPN   | ATTTAGACGGAGAGAGTGA                    |
| +ETDA      | MADG   | ATTTAGACGGAGAGAGTGA                    |
|            |        |                                        |
| -ETDA      | CALI   | CCGACCATTATAT-----CTGTACATAC (-691 bp) |
| -ETDA      | CHNA   | CCGACCATTATAT-----CTGTACATAC           |
| +ETDA      | POLD   | CCGACCATTATAT-----CTGTACATAC           |
| +ETDA      | HAWA   | CCGACCATTATATTTTCCACATCTGTACATAC       |
| +ETDA      | WASH   | CCGACCATTATATTTTCCACATCTGTACATAC       |
| +ETDA      | BOLI   | CCGACCATTATATTTTCCACATCTGTACATAC       |
| +ETDA      | JAPN   | CCGACCATTATATTTTCCACATCTGTACATAC       |
| +ETDA      | MADG   | CCGACCATTATATTTTCCACATCTGTACATA        |

Fig. S4. Differences in putative regulatory 1.9-kb upstream sequences from *P. pacificus* strains. Only common differences between ETDA-insensitive strains (California and China) and ETDA-attractive strains (Hawaii, Washington, Bolivia R55275, Japan R55195, and Madagascar) are shown. Poland strain is the most genetically similar strain to California based on nuclear and mitochondrial sequences of 84 isolated strains.



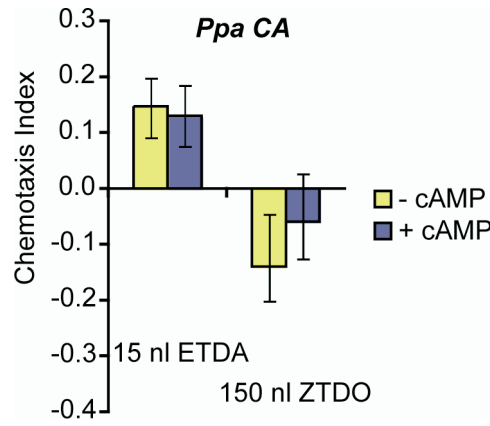

Fig. 56. 500  $\mu$ M exogenous 8-bromo-cAMP did not enhance pheromone attraction in *P. pacificus* California (in contrast to 8-bromo-cGMP).



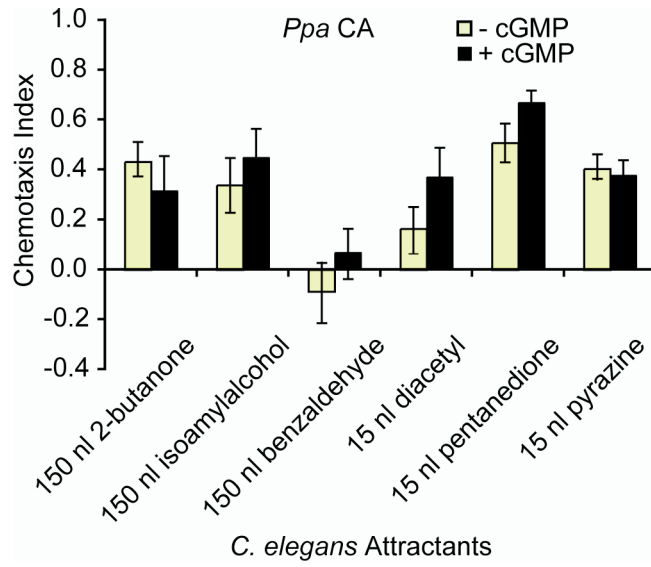

**Fig. S7.** Exogenous cGMP treatment of *P. pacificus* California did not enhance attraction to 150 nl of known *C. elegans* attractants 2-butanone, isoamyl alcohol, benzaldehyde, or 15 nl of diacetyl or 2,3-pentanedione.





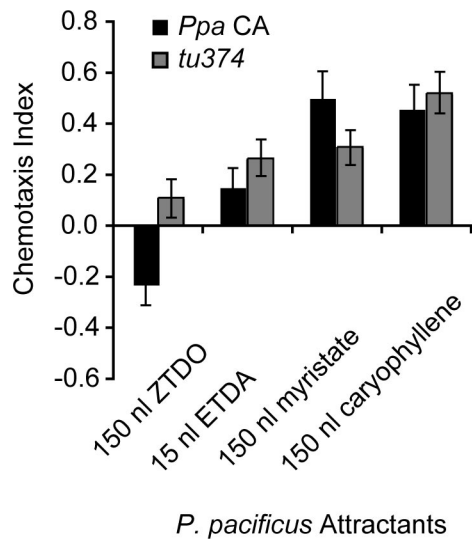

Fig. 510. *tu374* retained wild-type chemotaxis to *P. pacificus* attractants ZTDO, ETDA, myristate, and  $\beta$ -caryophyllene.





Table S1. *Pristionchus pacificus* and *Pristionchus* sp. 11 strains

| Strain  | Geographical locality      | Ecological origin         |
|---------|----------------------------|---------------------------|
| RS5228* | Japan (Mount Hiei)         | soil                      |
| JU150†  | Madagascar (Antananarivo)  | soil                      |
| RS106†  | Poland (Augustow)          | soil                      |
| JU723†  | China (Longsheng, Guangxi) | soil                      |
| PS312†  | California (Pasadena)      | soil                      |
| PS1843† | Washington (Port Angeles)  | soil                      |
| JU138†  | Hawaii (Captain Cook)      | soil                      |
| SB5880† | New York                   | soil                      |
| RS5131† | Massachusetts (Carver)     | <i>Exomala</i> sp.        |
| RS5134† | Ohio (Wooster)             | <i>Phyllophaga</i> sp.    |
| RS5275  | Bolivia (Santa Cruz)       | scarab beetles            |
| RS5270  | Bolivia (Santa Cruz)       | scarab beetles            |
| RS5271  | Bolivia (Santa Cruz)       | scarab beetles            |
| RS5264  | Bolivia (Santa Cruz)       | scarab beetles            |
| JU482†  | Japan (Hakone)             | soil                      |
| RS5180† | Japan (Hakone)             | <i>Exomala orientalis</i> |
| RS5187† | Japan (Hakone)             | <i>Exomala orientalis</i> |
| RS5195† | Japan (Hakone)             | <i>Exomala orientalis</i> |
| RS5210† | Japan (Hakone)             | <i>Exomala orientalis</i> |
| RS5188† | Japan (Hakone)             | <i>Exomala orientalis</i> |

\*All strains are *Pristionchus pacificus*, except for RS5228, which is a strain of *Pristionchus* sp. 11.

†These strains were described in refs. 1 and 2, previously. With the exception of RS106, all "RS" strains were isolated from field trips aimed to search for the natural habitat of *P. pacificus*. Bolivian strains came from multiple species of "scarab beetles."

- Herrmann M, Mayer W, Hong RL, Kienle S, Minasaki R, Sommer RJ (2007) The nematode *Pristionchus pacificus* (Nematoda: Diplogastridae) is associated with the Oriental beetle *Exomala orientalis* (Coleoptera: Scarabaeidae) in Japan. *Zoological Science*, 24:883–889.
- Zauner H, et al. (2007) Distinct patterns of genetic variation in *Pristionchus pacificus* and *Caenorhabditis elegans*, two partially selfing nematodes with cosmopolitan distribution. *Mol Ecol* 16:1267–1280.





**Table S3. Predicted *P. pacificus* genes based on *E* values of  $<e^{-10}$  (Wormpep160) in the region contig 85.25 to contig 85.32**

| Predicted gene (predicted function)             | TBLASTX <i>E</i> value |
|-------------------------------------------------|------------------------|
| <i>cyp-14</i> (cytochrome P450)                 | $e^{-12}$              |
| <i>glt-3</i> (amino acid glutamate transporter) | $e^{-23}$              |
| ATP pathway                                     | $e^{-29}$              |
| CE27192 (?)                                     | $e^{-19}$              |
| CE36059 (UTP-galactose transporter)             | $e^{-12}$              |
| CE27512 (nuclear transport)                     | $e^{-16}$              |
| CE36898 (?)                                     | $e^{-11}$              |
| CE33241 (ATPase)                                | $e^{-22}$              |
| CE36718 (?)                                     | $e^{-17}$              |

?, unknown function in *C. elegans*.

**Table S4. Number of eggs and brood size in California wild type and *tu374***

| Strain       | Eggs, no.* | Progeny, no.* | Hatching, % |
|--------------|------------|---------------|-------------|
| Wild type    | 155 ± 5    | 149 ± 4       | 96          |
| <i>tu374</i> | 139 ± 5    | 107 ± 4       | 77          |

Average and SEM values for total eggs and live progeny produced over three days at 20° C ( $n = 34$  each).

\*Significant differences between the two genotypes for the number of eggs laid and progeny are  $P = 0.017$  and  $P < 0.0001$ , respectively, using Wilcoxon one-way test. The *P. pacificus* CA wild type holds  $\leq 2$  eggs in uterus and may mask the egg-laying phenotype that is more apparent in the *C. elegans* N2 wild type, which holds more eggs.
